# Supplementary material for: Mapping Symptom-General and Symptom-Specific Targets for Transcranial Magnetic Stimulation in Schizophrenia: An Electrical Modeling Meta-Analysis
Source: Research Square preprint supplement (doi:10.21203/rs.3.rs-5565115/v1), 2025-01-08
Supplement: Supplementary file 1 [file 4863a509b1d6cad89242562c.docx]

**SUPPLEMENTARY INFORMATION**

**Appendix S1.** Nonsignificant Findings

**Appendix S2.** Search Strings Related to Schizophrenia and TMS Used for the Other Databases

**Appendix S3.** List of Excluded Studies From the Standard Meta-Analysis

**Appendix S4.** List of Excluded Studies From the FEM Simulations

**Figure S1.** PRISMA algorithm

**Figure S2.** Forest Plot of Effect Sizes (SMD) of TMS in Schizophrenia across all symptoms

**Figure S3.** Forest Plot of Effect Sizes (SMD) of TMS Targeting Negative Symptoms in Schizophrenia

**Figure S4.** Forest Plot of Effect Sizes (SMD) of TMS Targeting Cognitive Symptoms in Schizophrenia

**Figure S5.** Forest Plot of Effect Sizes (SMD) of TMS Targeting Positive Symptoms in Schizophrenia

**Figure S6.** Funnel Plot Analysis for Publication Bias Assessment Across Symptom-General and Symptom-Specific Domains of Schizophrenia

**Table S1.** Study Overview of Included Randomized Controlled Trials in Negative Symptoms

**Table S2.** Study Overview of Included Randomized Controlled Trials in Cognitive Symptoms

**Table S3.** Study Overview of Included Randomized Controlled Trials in Positive Symptoms

**Table S4.** Risk-of-Bias Assessments

This supplemental material has been provided by the authors to give readers additional information about their work.

**Appendix S1.** Nonsignificant Findings

1. **Meta-analysis of TMS effects on negative symptoms of schizophrenia**
   1. **Low-frequency TMS (1 Hz) stimulation sub-group**

Six sham-controlled studies delivered low-frequency stimulation TMS (1 Hz) targeting negative symptoms in schizophrenia via stimulation of the left prefrontal cortex (L-PFC) and left temporo-parietal cortex (L-TPC). The confidence interval was wide: 95% CI: -0.31 to 0.44 with no significant effect size over TMS (p=0.75).

- 1. **Left temporo-parietal target sub-group**

Six sham-controlled studies investigated the effects of TMS on the negative symptoms of schizophrenia by targeting the left temporo-parietal cortex (L-TPC).The confidence interval was wide: 95% CI: -0.27 to 0.42 with no significant effect size over TMS (p=0.67).

- 1. **Cerebellum target sub-group**

Five sham-controlled studies investigated the effects of TMS on the negative symptoms of schizophrenia by targeting vermis in the cerebellum. The confidence interval was wide: 95% CI : -0.64 to 0.90 with no significant effect size over TMS (p=0.74).

1. **Meta-analysis of TMS effects on positive symptoms of schizophrenia**
   1. **Main group**

Eighteen sham-controlled studies targeted positive symptoms in schizophrenia irrespective of target and protocol. The confidence interval was wide: 95% CI: -0.24 to 0.51 with no significant effect size over TMS (p=0.47).

- 1. **Low-frequency TMS (1 Hz) stimulation sub-group**

Eleven sham-controlled studies delivered low-frequency stimulation TMS (1 Hz) targeting positive symptoms in schizophrenia. The confidence interval was wide: 95% CI: -0.65 to 0.57 with no significant effect size over TMS (p=0.81).

1. **Association between optimal targets and actual study sites**
   1. **Left motor (M1) optimal target across symptom domains**

The association between treatment response and the distance of actual TMS study sites to the optimal target in the left motor across symptom domains was not significant (r = -0.07, p = 0.6 ).

- 1. **Left premotor optimal target in negative symptoms**

The association between treatment response and the distance of actual TMS study sites to the optimal target in the left premotor in the negative symptom domain was not significant (r = -0.27, p = 0.3).

**Appendix S2.** Search Strings Related to Schizophrenia and TMS Used for the Other Databases

**PubMed:**

(“schizophreni*” OR "schizoaffective disorder" OR "schizophreniform disorder" OR "schizophrenia"[MeSH Terms] OR “CHR” OR “Clinical High Risk” OR “Ultra High Risk” OR “UHR” OR "Psychotic Disorders"[MeSH Terms] OR "Psychotic Disorder*") AND ("transcranial magnetic stimulation" OR "TMS" OR "rTMS" OR "theta burst" OR "iTBS" OR “cTBS” OR "transcranial Magnetic Stimulation*"[MeSH Terms])

884 hits

**EMBASE:**

('schizophreni*':ab,kw,ti OR 'schizoaffective disorder':ab,ti,kw OR 'schizophreniform disorder':ab,kw,ti OR 'schizophrenia spectrum disorder'/exp OR 'psychotic disorder*':ab,kw,ti OR ‘CHR’:ab,kw,ti OR ‘Clinical High Risk’:ab,kw,ti OR ‘Ultra High Risk’:ab,kw,ti OR ‘UHR’:ab,kw,ti) AND ('transcranial magnetic stimulation':ab,kw,ti OR 'tms':ab,kw,ti OR 'rtms':ab,kw,ti OR 'theta burst':ab,kw,ti OR 'itbs':ab,kw,ti OR 'cTBS':ab,kw,ti OR 'transcranial magnetic stimulation'/exp) AND ('article'/it OR 'article in press'/it OR 'review'/it)

1,039 hits

**PsycINFO:**

(schizophreni* OR "schizoaffective disorder" OR "schizophreniform disorder" OR "Psychotic Disorder*" OR “CHR” OR “Clinical High Risk” OR “Ultra High Risk” OR “UHR”) AND ("transcranial magnetic stimulation" OR "TMS" OR "rTMS" OR "theta burst" OR "iTBS" OR “cTBS”)

Source type: Scholarly Journals

864 hits

**Web of Sciences (Web of Science, Core Database Collection):**

(schizophreni* OR "schizoaffective disorder" OR "schizophreniform disorder" OR "Psychotic Disorder*" OR “CHR” OR “Clinical High Risk” OR “Ultra High Risk” OR “UHR”) AND ("transcranial magnetic stimulation" OR "TMS" OR "rTMS" OR "theta burst" OR "iTBS" OR “cTBS”)

Search type: “Topic”. Document type: Article, review, proceedings paper, early access

1,482 hits

**In total 4,269 hits**

**After removal of 2,013 duplicates: 2,256 final hits**

**Appendix S3. List of Excluded Studies From the Standard Meta-Analysis**

**1.** **Studies not in TMS**

**Negative Symptoms (N=2 studies):**

Lisoni et al. (2022) doi: [10.1016/j.jpsychires.2022.09.011](https://doi.org/10.1016/j.jpsychires.2022.09.011)

Palm et al. (2016) doi: 10.1093/schbul/sbw041

**Cognitive Symptoms (N=1 study):**

Jeon et al. (2018) doi: 10.1016/j.schres.2017.12.009

**Positive Symptoms (N=4 studies):**

Brunelin et al. (2012) doi: 10.1176/appi.ajp.2012.11071091

Chang et al. (2018) doi: 10.1093/ijnp/pyy071

Fitzgerald et al. (2014) doi: 10.1016/j.brs.2014.07.036

Koops et al. (2018) doi: 10.1016/j.schres.2018.06.058

**2.** **Studies with no full report of baseline/endpoint scores**

**Negative Symptoms (N=11 studies):**

Gan et al. (2014a) doi: PMID: 27337795

Gan et al. (2014b) doi: PMID: 27337795

Gan et al. (2015) doi: PMID: 27337795

Goyal et al. (2007) doi: [10.1176/jnp.2007.19.4.464](https://doi.org/10.1176/jnp.2007.19.4.464)

Güleken et al. (2020) doi: [10.1016/j.scog.2020.100183](https://doi.org/10.1016/j.scog.2020.100183)

Novak et al. (2006) doi: PMID: 16648775

Prikryl et al. (2007) doi: [10.1016/j.schres.2007.06.019](https://doi.org/10.1016/j.schres.2007.06.019)

Rosa et al. (2007) doi: [10.4088/jcp.v68n1009](https://doi.org/10.4088/jcp.v68n1009)

Schneider et al. (2008a) doi: [10.1016/j.jpsychires.2005.02.008](https://doi.org/10.1016/j.jpsychires.2005.02.008)

Schnieder et al. (2008b) doi: [10.1016/j.jpsychires.2005.02.008](https://doi.org/10.1016/j.jpsychires.2005.02.008)

Wen-Xiang et al. (2012) doi: [10.1016/j.neulet.2014.10.029](https://doi.org/10.1016/j.neulet.2014.10.029)

**Cognitive Symptoms (N=1 study):**

Voineskos et al. (2021) doi: 10.1016/j.bpsc.2020.11.011

**Positive Symptoms (N=1 study):**

Vercammen et al. (2009) doi: 10.1176/appi.neuropsych.21.3.260

**3.** **Studies without end of treatment scores**

**Negative Symptoms (N=1 study):**

Quan et al. (2015a) doi: 10.1016/j.neulet.2014.10.029

**4.** **Studies with primary outcome in another domain**

**Negative Symptoms (N=2 studies):**

Guan et al. (2020) doi: 10.1038/s41398-020-0745-6, primary outcome is cognitive dysfunction.

Rosenberg et al. (2012) doi: [10.1186/1744-859X-11-13](https://doi.org/10.1186/1744-859x-11-13), primary outcome is auditory hallucinations.

**Appendix S4. List of Excluded Studies From the FEM Simulations**

**1.** **Studies not retained due to no report of coil type**

**Negative Symptoms (N=12 studies):**

Bai et al. (2015) doi: Chin. J. Health Psychol. 2015;23:649–653

Duan et al. (2013) doi: [10.1038/s41537-022-00248-6](https://doi.org/10.1038%2Fs41537-022-00248-6)

Liu et al. (2008) doi: [10.3969/j.issn.1672-0458.2008.03.002](http://dx.chinadoi.cn/10.3969/j.issn.1672-0458.2008.03.002)

Ma et al. (2016) doi: [10.3877/cma.j.issn.1674-0785.2016.14.007](http://dx.chinadoi.cn/10.3877/cma.j.issn.1674-0785.2016.14.007)

Ren et al. (2011) doi: [10.3969/j.issn.1000-6729.2011.02.003](http://dx.chinadoi.cn/10.3969/j.issn.1000-6729.2011.02.003)

Tikka et al. (2017) doi: 10.1097/YCT.0000000000000343

Wang et al. (2015) doi: [10.11919/j.issn.1002-0829.217024](https://doi.org/10.11919%2Fj.issn.1002-0829.217024)

Wang et al. (2020) doi: [10.1016/j.schres.2019.12.008](https://doi.org/10.1016/j.schres.2019.12.008)

Xu et al. (2006) doi: [10.3321/j.issn:1673-8225.2006.46.012](http://dx.chinadoi.cn/10.3321/j.issn:1673-8225.2006.46.012)

Xu et al. (2015) doi: NA

Zhang et al. (2010) doi: [10.3969/j.issn.1002-0829.2010.05.002](http://dx.chinadoi.cn/10.3969/j.issn.1002-0829.2010.05.002)

Zhang et al. (2015) doi: [10.3969/j.issn.1672-9463.2015.09.008](http://dx.chinadoi.cn/10.3969/j.issn.1672-9463.2015.09.008)

**2.** **Studies not retained due to no report of method of targeting and inferred coordinates**

**Negative Symptoms (N=8 studies):**

Li et al. (2016) doi: [10.1016/j.psychres.2016.04.046](https://doi.org/10.1016/j.psychres.2016.04.046)

Prikryl et al. (2012) doi: [10.1017/S1461145712000508](https://doi.org/10.1017/S1461145712000508)

Zhao et al. (2014a) doi: 10.3969/j.issn.1002-0829.2014.01.003

Zhao et al. (2014b) doi: 10.3969/j.issn.1002-0829.2014.01.003

Zhao et al. (2014c) doi: 10.3969/j.issn.1002-0829.2014.01.003

Zheng et al. (2012a) doi: PMID: 23073583

Zheng et al. (2012b) doi: PMID: 23073583

Zheng et al. (2012c) doi: PMID: 23073583

**3.** **Studies not retained due to coil type not supported in SimNIBS**

**Negative Symptoms (N=5 studies):**

De Jesus et al. (2011) doi: [10.1016/j.psychres.2010.11.022](https://doi.org/10.1016/j.psychres.2010.11.022) (Neurosoft Ltd.)

Huang et al. (2016) doi: [10.11919/j.issn.1002-0829.216044](https://doi.org/10.11919/j.issn.1002-0829.216044) (YRDCCY-I)

Klein et al. (1999) doi: [10.1016/s0006-3223(99)00182-1](https://doi.org/10.1016/s0006-3223(99)00182-1) (Cadwell)

Quan et al. (2015b) doi: [10.1016/j.neulet.2014.10.029](https://doi.org/10.1016/j.neulet.2014.10.029) (Cadwell)

Wen et al. (2021) doi: PMID: 27337795 (YRDCCY-I)

**Cognitive Symptoms (N=1 study):**

Wen et al. (2021) doi: PMID: 27337795 (YRDCCY-I)

**Positive Symptoms (N=1 study):**

Lee et al. (2004) doi: [10.1016/j.neulet.2004.11.048](https://doi.org/10.1016/j.neulet.2004.11.048) (Neotonus)

**
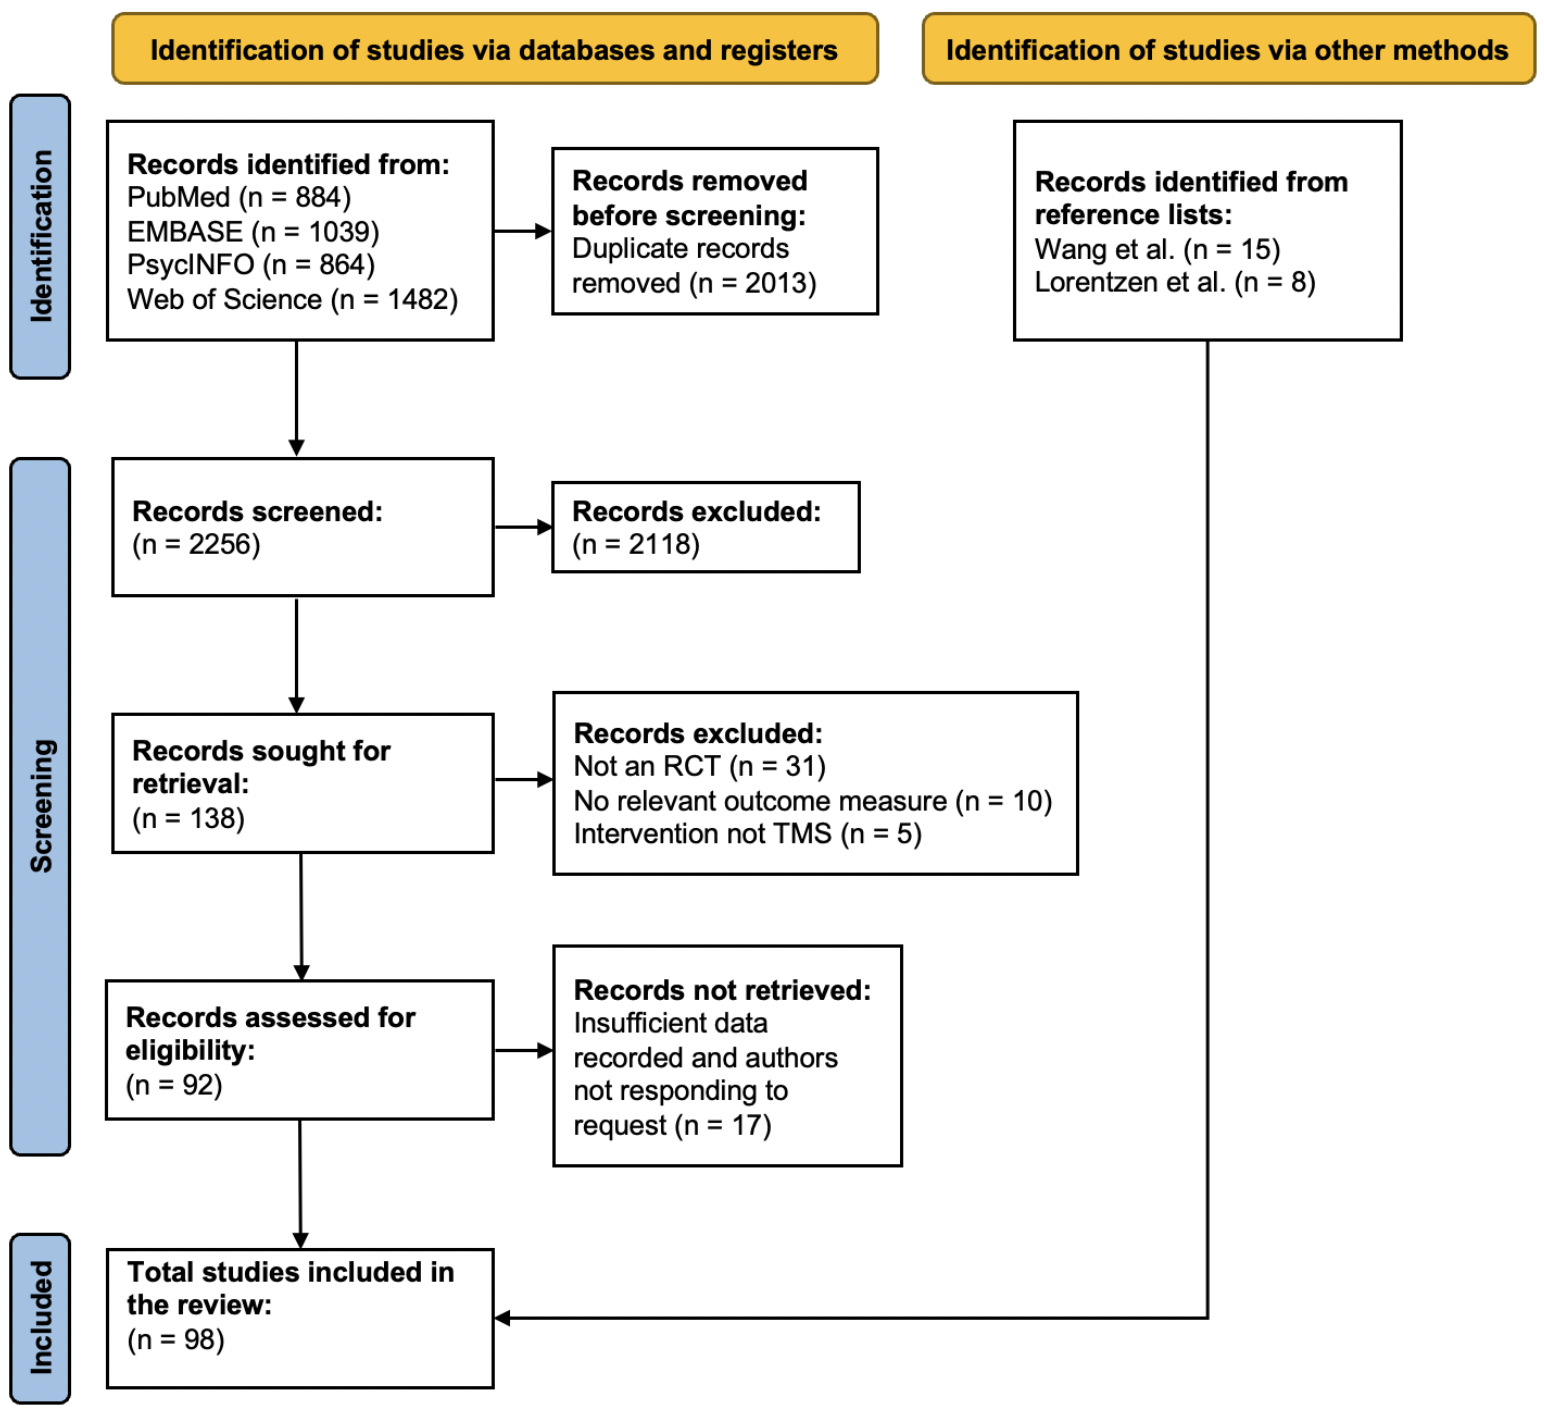
**

**Figure S1. Preferred Reporting Items for Systematic Reviews and Meta-Analyses (PRISMA) flow chart.** Abbreviations: EMBASE = Excerpta Medica Database; PsycINFO = Psychological Information Database; Web of Science = Web of Science, Core Database Collection.

**
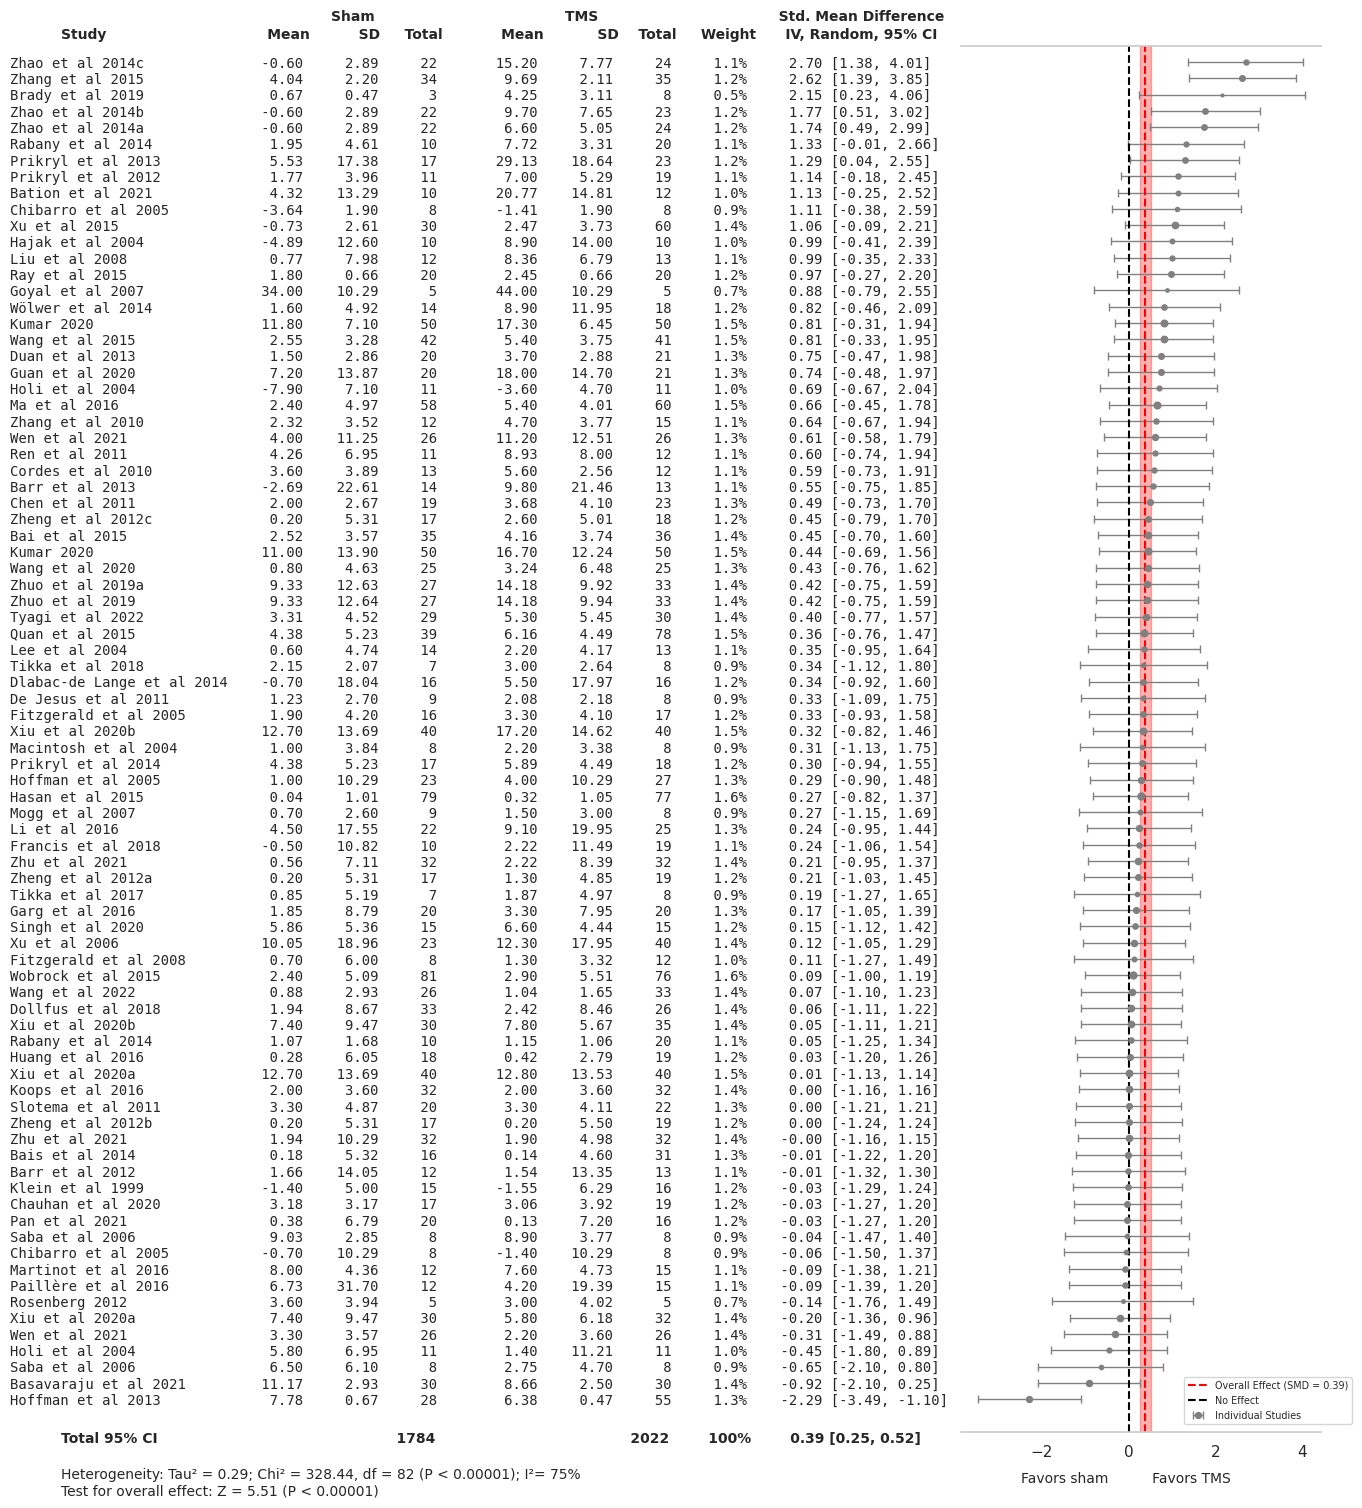
**

**Figure S2.** Forest Plot of Effect Sizes (SMD) of TMS in Schizophrenia Across all Symptoms

**
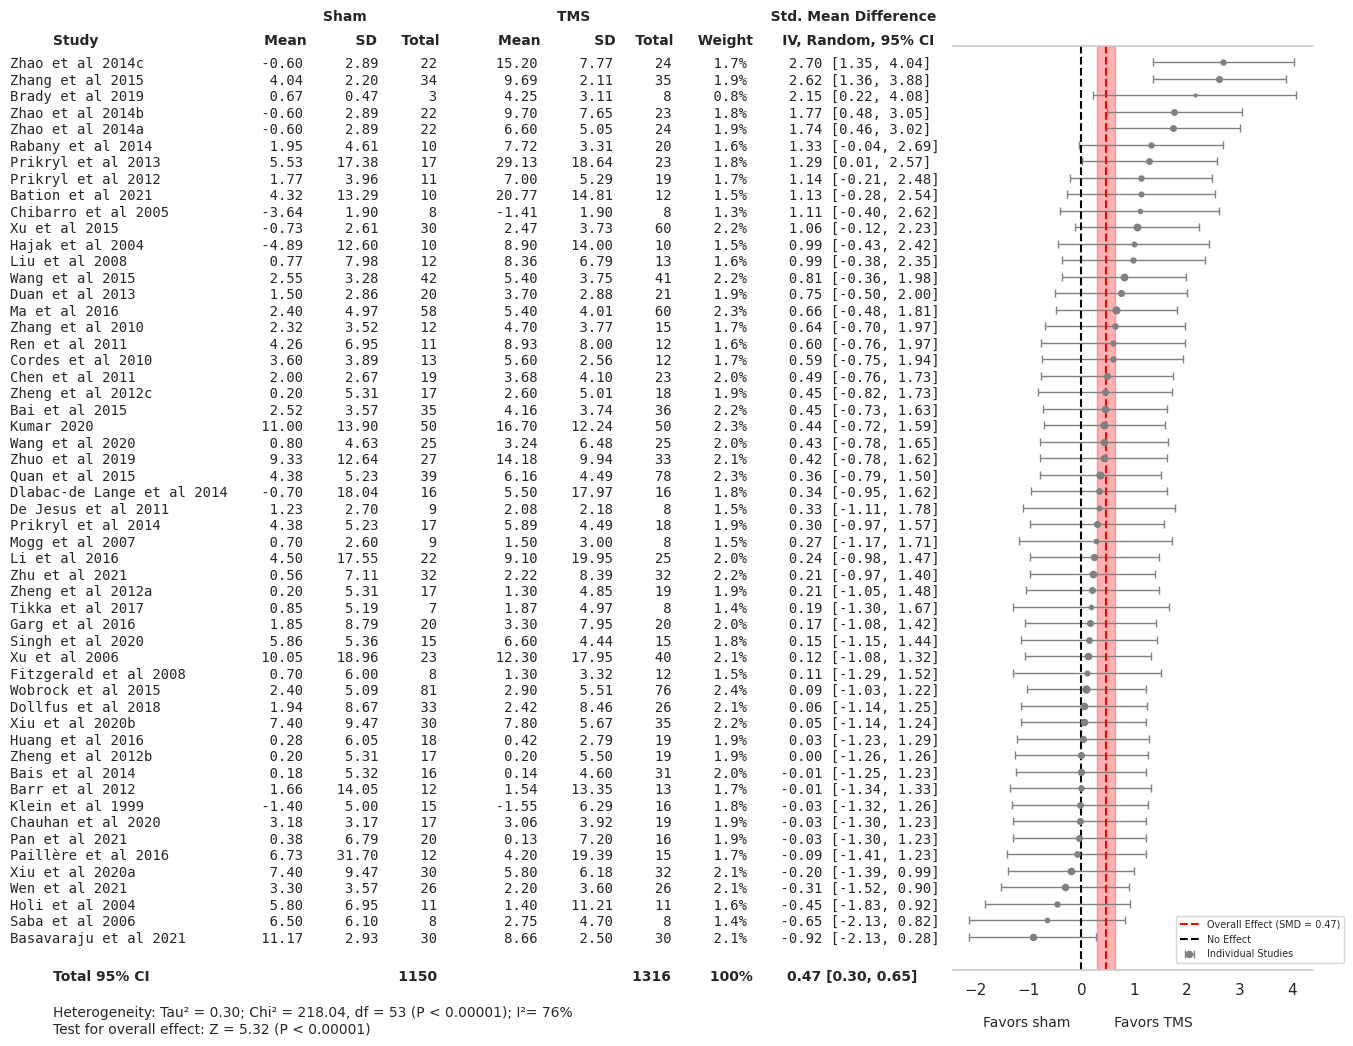
**

**Figure S3.** Forest Plot of Effect Sizes (SMD) of TMS Targeting Negative Symptoms in Schizophrenia

**
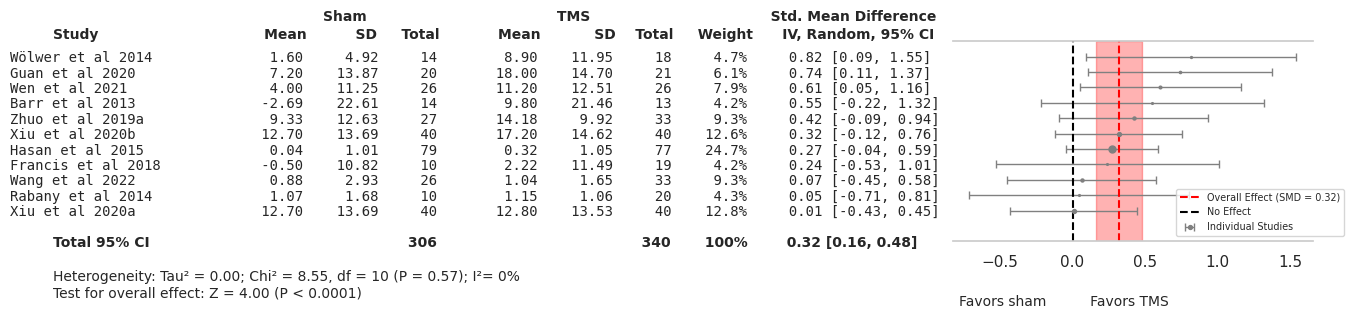
**

**Figure S4.** Forest Plot of Effect Sizes (SMD) of TMS Targeting Cognitive Symptoms in Schizophrenia

**
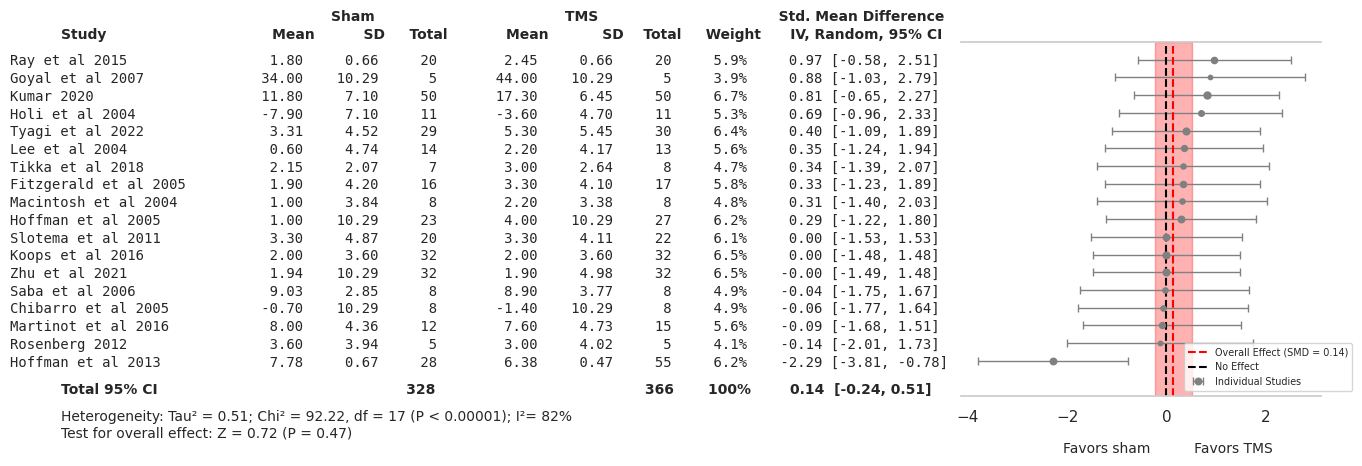
**

**Figure S5.** Forest Plot of Effect Sizes (SMD) of TMS Targeting Positive Symptoms in Schizophrenia

**
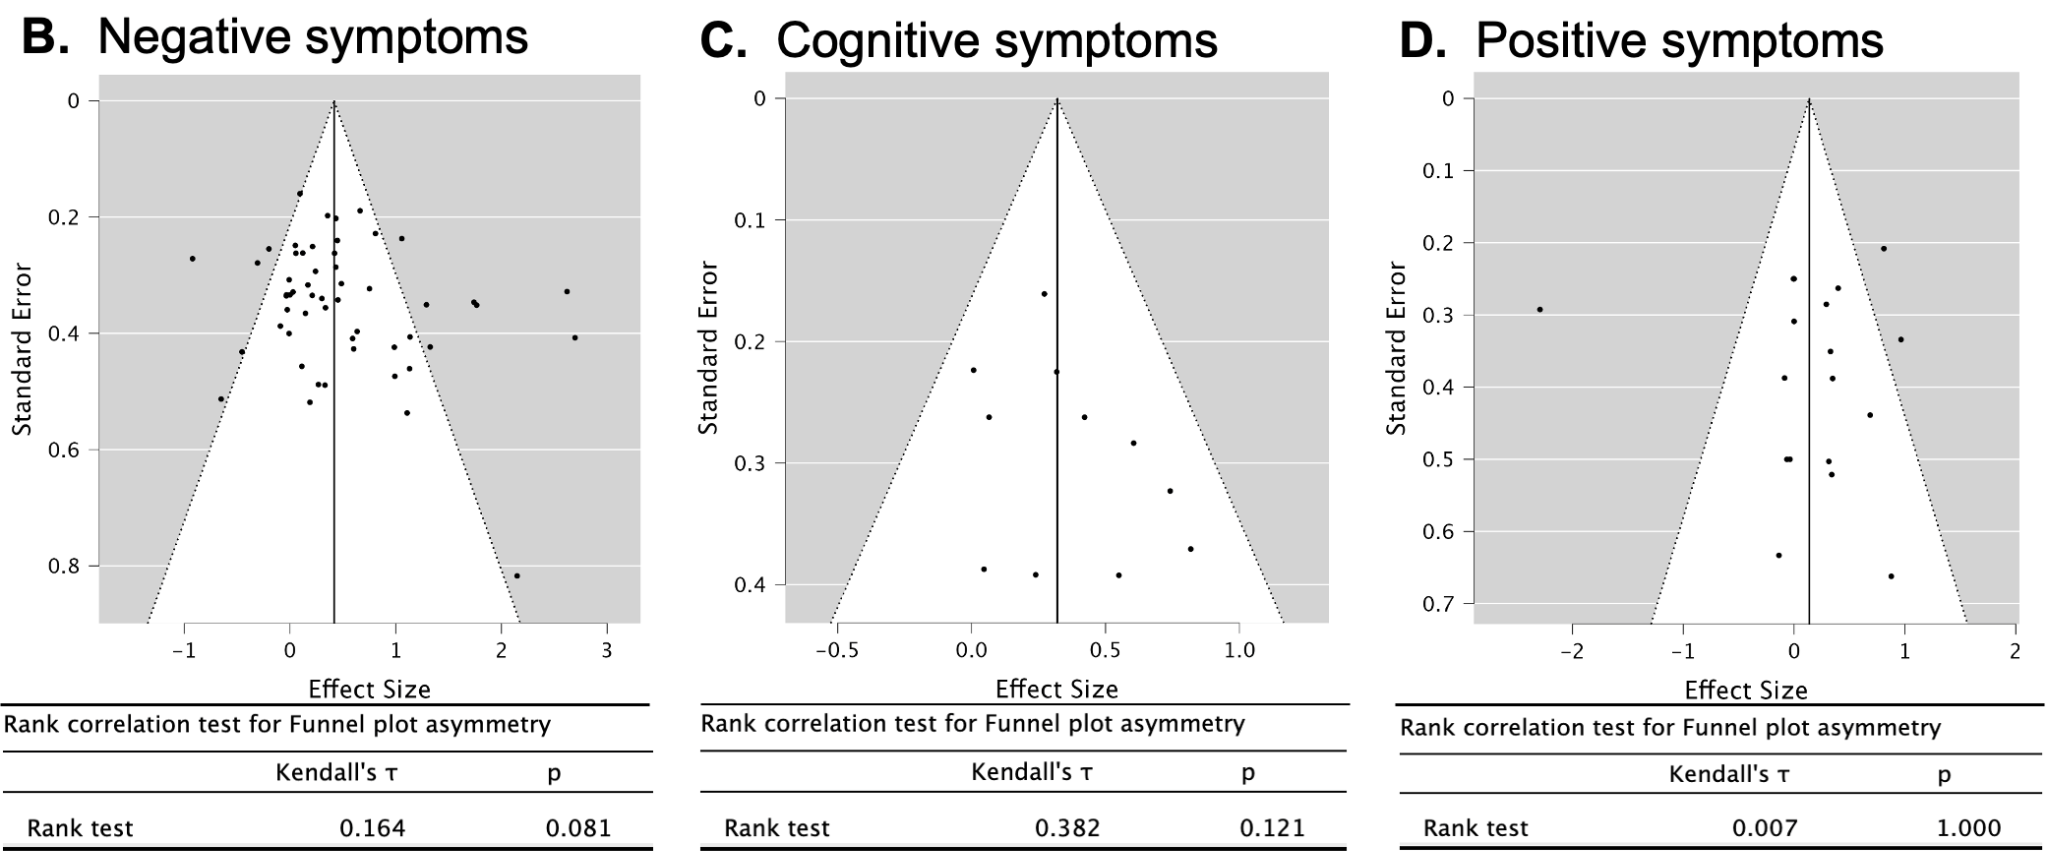
**
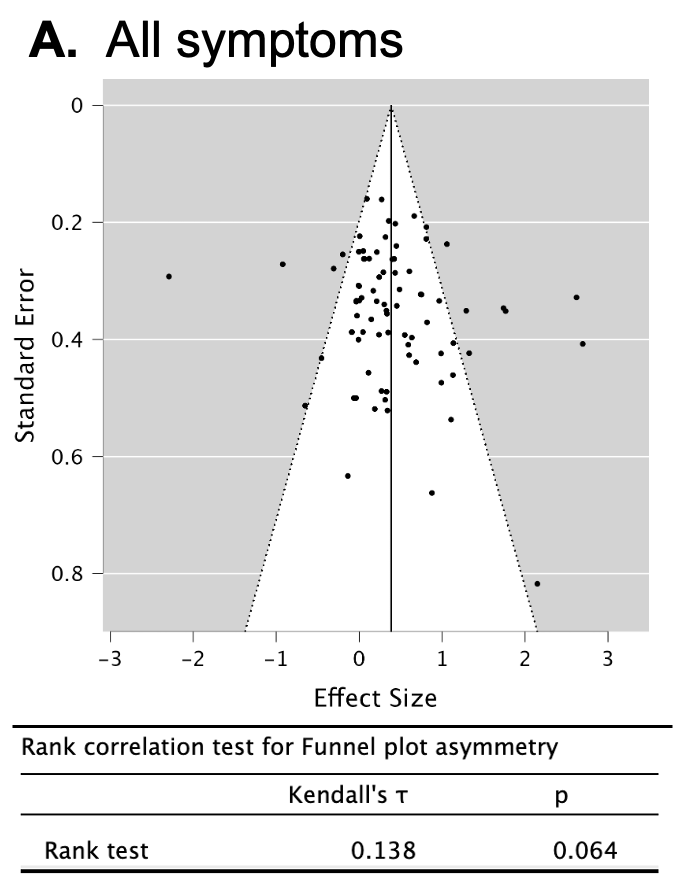


**Figure S6. Funnel Plot Analysis for Publication Bias Assessment in Symptom-General and Symptom-Specific Domains of Schizophrenia.** Each plot compares the standard error against the effect size of studies, with the vertical line indicating the overall effect size (SMD) determined by the meta-analysis. The dashed lines represent the expected distribution of studies in the absence of bias. Points falling outside these lines suggest potential asymmetry, indicating possible bias or heterogeneity. The asymmetry in the plot is evaluated using Kendall’s rank correlation test.

**Table S1. Study Overview of Included Randomized Controlled Trials in Negative Symptoms**


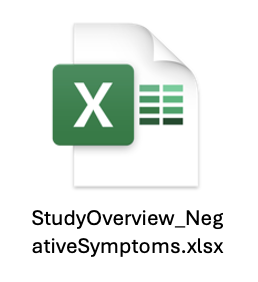


**Table S2. Study Overview of Included Randomized Controlled Trials in Cognitive Symptoms**


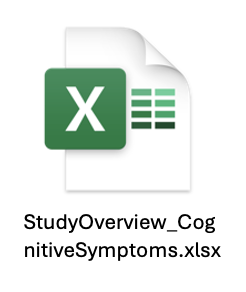


**Table S3. Study Overview of Included Randomized Controlled Trials in Positive Symptoms**


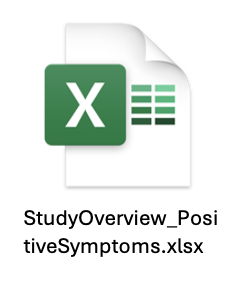


**Table S4. Risk-of-Bias Assessments**

| **NEGATIVE SYMPTOMS: Study** | **Random sequence generation (selection bias)** | **Allocation concealment (selection bias)** | **Blinding of participants and personnel (performance bias)** | **Blinding of outcome assessment (detection bias)** | **Incomplete outcome data (attrition bias)** | **Selective reporting (reporting bias)** | **Other bias** |
| --- | --- | --- | --- | --- | --- | --- | --- |
| **1.** **Bai et al 2015** | Low | Some concerns | Low | Some concerns | Some concerns | Low | Low |
| **2.** **Bais et al 2014** | Low | Low | Low | Low | Low | Low | Low |
| **3.** **Barr et al 2012** | Low | Low | Low | Low | Low | Low | Low |
| **4.** **Basavaraju et al 2021** | Low | Low | Low | Low | Some concerns | Low | Low |
| **5.** **Bation et al 2021** | Low | Low | Some concerns | Low | Low | Low | Some concerns |
| **6.** **Brady et al 2019** | Low | Low | Low | Low | Low | Low | Low |
| **7.** **Chauhan et al 2020** | Low | Low | Some concerns | Some concerns | Low | Low | Low |
| **8.** **Chen et al 2011** | Low | Low | Low | Low | Low | Low | Some concerns |
| **9.** **Chibarro et al 2005** | Low | Some concerns | Low | Low | Low | Low | Some concerns |
| **10.** **Cordes et al 2010** | Low | Low | Low | Low | Low | Low | Low |
| **11.** **De Jesus et al 2011** | Low | Low | Low | Low | Low | Low | Some concerns |
| **12.** **Dlabac-de Lange et al 2014** | Low | Low | Low | Low | Low | Low | Low |
| **13.** **Dollfus et al 2018** | Low | Low | Low | Low | Some concerns | Low | Some concerns |
| **14.** **Duan et al 2013** | Some concerns | Some concerns | Some concerns | Some concerns | Some concerns | Some concerns | Some concerns |
| **15.** **Fitzgerald et al 2008** | Low | Low | Some concerns | Low | Low | Low | Some concerns |
| **16.** **Gan et al 2014a** | Low | Some concerns | Some concerns | Low | Some concerns | Low | Some concerns |
| **17.** **Gan et al 2014b** | Low | Some concerns | Some concerns | Low | Some concerns | Low | Some concerns |
| **18.** **Gan et al 2015** | Low | Some concerns | Some concerns | Low | Low | Low | Some concerns |
| **19.** **Garg et al 2016** | Low | Some concerns | Some concerns | Low | Low | Low | Low |
| **20.** **Goyal et al 2007** | Low | Some concerns | Low | Low | Low | Low | Some concerns |
| **21.** **Güleken et al 2020** | Low | Some concerns | Low | Low | Some concerns | Low | Some concerns |
| **22.** **Hajak et al 2004** | Low | Low | Low | Low | Some concerns | Low | Low |
| **23.** **Holi et al 2004** | Low | Low | Low | Low | Some concerns | Low | Some concerns |
| **24.** **Huang et al 2016** | Low | Low | Low | Low | Low | Low | Low |
| **25.** **Klein et al 1999** | Low | Low | Low | Some concerns | Low | Low | Low |
| **26.** **Kumar 2020** | Low | Low | Low | Low | Low | Low | Low |
| **27.** **Li et al 2016** | Low | Low | Low | Low | Low | Low | Low |
| **28.** **Lisoni et al 2022** | Low | Low | Low | Some concerns | Low | Low | Low |
| **29.** **Liu et al 2008** | Some concerns | Some concerns | Some concerns | Low | Some concerns | Some concerns | Low |
| **30.** **Ma et al 2016** | Low | Some concerns | Some concerns | Low | Low | Some concerns | Low |
| **31.** **Mogg et al 2007** | Low | Some concerns | Low | Low | Low | Low | Low |
| **32.** **Novak et al 2006** | Some concerns | High | High | Low | Low | Low | High |
| **33.** **Paillère et al 2016** | Low | Low | Low | Low | Low | Low | Low |
| **34.** **Palm et al 2016** | Low | Low | Low | Low | Low | Low | Low |
| **35.** **Pan et al 2021** | Some concerns | Low | Low | Low | Low | Low | Some concerns |
| **36.** **Prikryl et al 2007** | Low | Low | Low | Low | Some concerns | Some concerns | Some concerns |
| **37.** **Prikryl et al 2012** | Some concerns | High | High | Low | High | Some concerns | Low |
| **38.** **Prikryl et al 2013** | Some concerns | High | High | Low | Some concerns | Some concerns | Low |
| **39.** **Prikryl et al 2014** | Some concerns | High | High | Low | Some concerns | Some concerns | Some concerns |
| **40.** **Quan et al 2015** | Low | Low | Low | Low | Low | Low | Low |
| **41.** **Quan et al 2015** | Low | Low | Low | Low | Low | Low | Low |
| **42.** **Rabany et al 2014** | Some concerns | Some concerns | Low | Low | Low | Low | Low |
| **43.** **Ren et al 2011** | Some concerns | Some concerns | Some concerns | Some concerns | Some concerns | Some concerns | Some concerns |
| **44.** **Rosa et al 2007** | Some concerns | Low | Low | Low | Low | Low | Low |
| **45.** **Saba et al 2006** | Some concerns | Some concerns | Low | Low | Some concerns | Some concerns | Some concerns |
| **46.** **Schneider et al 2008a** | Low | Some concerns | Low | Low | Low | Low | Low |
| **47.** **Schneider et al 2008b** | Low | Some concerns | Low | Low | Low | Low | Some concerns |
| **48.** **Singh et al 2020** | Low | Low | Low | Low | Low | Low | Low |
| **49.** **Tikka et al 2017** | Low | Low | Low | Some concerns | Low | Low | Low |
| **50.** **Wang et al 2015** | Low | Low | Low | Low | Some concerns | Low | Some concerns |
| **51.** **Wang et al 2020** | Some concerns | Some concerns | Some concerns | Low | High | Low | Low |
| **52.** **Wen et al 2021** | Low | Low | Low | Low | Low | Low | Low |
| **53.** **Wen-Xiang et al 2012** | Low | Some concerns | Low | Low | Low | Low | Some concerns |
| **54.** **Wobrock et al 2015** | Low | Low | Low | Low | Low | Low | Low |
| **55.** **Xiu et al 2020a** | Low | Some concerns | Low | Low | Some concerns | Low | Some concerns |
| **56.** **Xiu et al 2020b** | Low | Some concerns | Low | Low | Some concerns | Low | Some concerns |
| **57.** **Xu et al 2006** | Low | Some concerns | Low | Low | Low | Low | Low |
| **58.** **Xu et al 2015** | Low | Some concerns | Low | Low | Low | Low | Low |
| **59.** **Zhang et al 2010** | Low | Some concerns | Low | Low | Low | Low | Low |
| **60.** **Zhang et al 2015** | Low | Some concerns | Some concerns | Some concerns | Low | Low | Some concerns |
| **61.** **Zhao et al 2014a** | Low | Low | Low | Some concerns | Some concerns | Some concerns | Some concerns |
| **62.** **Zhao et al 2014b** | Low | Low | Low | Some concerns | Some concerns | Some concerns | Some concerns |
| **63.** **Zhao et al 2014c** | Low | Low | Low | Some concerns | Some concerns | Some concerns | Some concerns |
| **64.** **Zheng et al 2012a** | Low | Some concerns | Low | Low | Low | Low | Low |
| **65.** **Zheng et al 2012b** | Low | Some concerns | Low | Low | Low | Low | Low |
| **66.** **Zheng et al 2012c** | Low | Some concerns | Low | Low | Low | Low | Low |
| **67.** **Zhu et al 2021** | Low | Low | Low | Low | Low | Low | Some concerns |
| **68.** **Zhuo et al 2019** | Low | Some concerns | Low | Low | Some concerns | Low | Low |
| **COGNITIVE SYMPTOMS: Study** | **Random sequence generation (selection bias)** | **Allocation concealment (selection bias)** | **Blinding of participants and personnel (performance bias)** | **Blinding of outcome assessment (detection bias)** | **Incomplete outcome data (attrition bias)** | **Selective reporting (reporting bias)** | **Other bias** |
| **1.** **Barr et al 2013** | Low | Low | Low | Low | Some concerns | Low | Low |
| **2.** **Francis et al 2018** | Low | Low | Low | Low | Low | Low | Low |
| **3.** **Guan et al 2020** | Low | Low | Low | Low | Some concerns | Low | Low |
| **4.** **Hasan et al 2015** | Low | Low | Low | Low | Low | Low | Low |
| **5.** **Jeon et al 2018** | Low | Low | Low | Low | Low | Low | Low |
| **6.** **Rabany et al 2014** | Some concerns | Some concerns | Low | Low | Low | Low | Low |
| **7.** **Voineskos et al 2021** | Low | Low | Low | Low | Low | Some concerns | Low |
| **8.** **Wang et al 2022** | Low | Some concerns | Low | Low | Some concerns | Low | Some concerns |
| **9.** **Wen et al 2021** | Low | Low | Low | Low | Low | Low | Low |
| **10. Wölwer et al 2014** | Low | Some concerns | Low | Low | Low | Low | Some concerns |
| **11.** **Xiu et al 2020a** | Low | Low | Low | Low | Low | Some concerns | Low |
| **12.** **Xiu et al 2020b** | Low | Low | Low | Low | Low | Some concerns | Low |
| **13.** **Zhuo et al 2019a** | Some concerns | Low | Low | Low | Some concerns | Low | Some concerns |
| **POSITIVE SYMPTOMS: Study** | **Random sequence generation (selection bias)** | **Allocation concealment (selection bias)** | **Blinding of participants and personnel (performance bias)** | **Blinding of outcome assessment (detection bias)** | **Incomplete outcome data (attrition bias)** | **Selective reporting (reporting bias)** | **Other bias** |
| **1.** **Brunelin et al 2012** | Low | Low | Low | Low | Low | Low | Low |
| **2.** **Chang et al 2018** | Low | Low | Low | Low | Low | Low | Low |
| **3.** **Chibarro et al 2005** | Low | Low | Low | Low | Low | Low | Low |
| **4.** **Fitzgerald et al 2005** | Low | Low | Low | Low | Low | Low | Low |
| **5.** **Fitzgerald et al 2014** | Low | Low | Low | Low | Low | Low | Low |
| **6.** **Goyal et al 2007** | Low | Low | Low | Low | Low | Low | Low |
| **7.** **Hoffman et al 2005** | Low | Low | Low | Low | Low | Some concerns | Low |
| **8.** **Hoffman et al 2013** | Low | Low | Low | Low | Some concerns | Some concerns | Low |
| **9.** **Holi et al 2004** | Low | Low | Low | Low | Low | Low | Low |
| **10.** **Koops et al 2016** | Low | Low | Low | Low | Low | Low | Low |
| **11.** **Koops et al 2018** | Low | Low | Low | Low | Low | Low | Low |
| **12.** **Kumar 2020** | Low | Low | Low | Low | Low | Low | Low |
| **13. Lee et al 2004** | Low | Some concerns | Low | Low | Low | Low | Some concerns |
| **14.** **Macintosh et al 2004** | Some concerns | Some concerns | Some concerns | Some concerns | Low | High | High |
| **15.** **Martinot et al 2016** | Low | Low | Low | Low | Low | Low | Low |
| **16.** **Ray et al 2015** | Low | Low | Low | Low | Low | Low | Low |
| **17.** **Rosenberg 2012** | Low | Low | Low | Low | Low | Low | Low |
| **18.** **Saba et al 2006** | Low | Low | Low | Low | Low | Low | Low |
| **19.** **Slotema et al 2011** | Low | Some concerns | Some concerns | Low | Low | Low | Low |
| **20.** **Tikka et al 2018** | Low | Low | Low | Some concerns | Low | Low | Low |
| **21.** **Tyagi et al 2022** | Low | Low | Low | Some concerns | Low | Low | Low |
| **22.Vercammen et al 2009** | Low | Low | Low | Low | Low | Low | Low |
| **23.** **Zhu et al 2021** | Low | Low | Low | Low | Low | Low | Low |
