# Supplementary material for: Mapping Symptom-General and Symptom-Specific Targets for Transcranial Magnetic Stimulation in Schizophrenia: An Electrical Modeling Meta-Analysis
Source: Research Square preprint supplement (doi:10.21203/rs.3.rs-5565115/v1), 2025-01-08
Supplement: Supplementary file 2 [file 89a7099829426875677fa6ff.xlsx]

## Sheet: Cognitive.Final
Study characteristics		Gender	Age		Population characteristics														Questionnaire type	Baseline`neuromod	Endpoint`neuromod	Mean change(SD)_neuromod	Baseline_control	Endpoint_control	Mean change(SD)_control	DOI	Reference
Study characteristics	Type of study	(men %)	TMS	Sham	n_neuromod	n_sham	Frequency	MT%	N of sessions	N of stimuli per session	Total number of pulses	TMS target	Neuronavigation	Method of targetting (scalp-based, anatomical, EEG landmarks, MNI coordinates (x y z))	Inferred coordinates	Nature of sham	type of coil	orientation
Barr et al 2013	rTMS vs sham	68	44.04 ± 12.80	49.00 ± 12.42	13	14	20Hz	90	20	750 pulses/region; or 1500 for both targets	30000	bilateral DLPFC	Yes	fMRI guided	_x0002_50, 30, 36 for the left DLPFC and _x0002_-50, 30, 36 for the right DLPFC	sham position	70-mm diameter figure-of-eight coil, Medtronic MagPro stimulator	Tangential to the midline	N-back accuracy (active)	40.06 (18.57)	49.86 (23.50)	9.80 (21.46)	36.02 (24.34)	33.33 (20.34)	-2.69 (22.61)	10.1016/j.biopsych.2012.08.020	https://pubmed.ncbi.nlm.nih.gov/23039931/
Francis et al 2018	rTMS vs sham	78.9	22.85	22.3 ± 2.0	19	10	20Hz	110	10	1200 pulses (600 per hemisphere)	12000	bilateral DLPFC	No	Scalp-based /5cm rule	-38, 25, 49	sham coil	Neuronetics Neurostar Treatment Device Modified figure-of-eight coil	Tangential to the midline	BACS composite	27.56 (11.56)	29.78 (11.41)	2.22 (11.49)	27.5 (7.9)	27.00 (12.33)	-0.50 (10.82)	10.1007/s11682-018-9902-4	Francis, M. M., Hummer, T. A., Vohs, J. L., Yung, M. G., Visco, A. C., Mehdiyoun, N. F., … Breier, A. (2018). Cognitive effects of bilateral high frequency repetitive transcranial magnetic stimulation in early phase psychosis: a pilot study. Brain Imaging and Behavior.
Guan et al 2020	rTMS vs sham	100	55.5 ± 7.3	49.3 ± 10.2	21	20	20Hz	110	40	1600	64000	left DPLFC	Yes	fMRI guided	NA	sham coil	MagStim Rapid stimulator coil	NA	RBANS total score	60.1 (12.5)	78.1 (16.2)	18.00 (14.70)	64.1 (12.7)	71.3 (14.8)	7.20 (13.87)	10.1038/s41398-020-0745-6	https://www.nature.com/articles/s41398-020-0745-6
Hasan et al 2015	rTMS vs sham	70.2	36.4±10.6	35.5± 9.0	77	79	10Hz	110	15	1000	15000	left DLPFC	No	EEG landmarks / F3	F3	sham position	Medtronic MagPro-X100 with passively cooled MCF-B65 figure-of-eight coils	Tangential to the midline	Neurocognitive Composite Score	-0.02 (1.1)	0.30 (1.0)	0.32 (1.05)	0.02 (0.9)	0.06 (1.1)	0.04 (1.01)	10.1093/schbul/sbv142	https://www.ncbi.nlm.nih.gov/pmc/articles/PMC4838079/
Rabany et al 2014	rTMS vs sham	70	34.533.1 ± 11.31	35.9 ± 11.00	20	10	20Hz	120	20	1680	33600	left DLPFC	No	Scalp-based / 5.5 cm anterior and 0.5 cm lateral from MT	NA	NA	Magstim Super Rapid stimulator (Magstim, UK) connected to an H1 deep-TMS coil	Tangential to the midline	CSA	NA	NA	1.147 (1.059)	NA	NA	1.075 ± 1.683	10.1177/026988111453360	https://journals.sagepub.com/doi/10.1177/0269881114533600?url_ver=Z39.88-2003&rfr_id=ori:rid:crossref.org&rfr_dat=cr_pub%20%200pubmed
Voineskos et al 2021	rTMS vs sham	71.6	37.05 ± 10.31	37.98 ± 11.22	41	40	20Hz	90	20	750	15000	bilateral DLPFC	Yes	fMRI guided	Talairach(x,y,z)= (-)50, 30, 36(left); +50, 30, 36 mm(right)	sham position	MagPro x 100 stimulator connected to a B65-type figure-of-eight coil	Tangential to the midline	3 Back working memory performance	NA	NA	NA	NA	NA	β = 0.14 (error 0.41) directly given	10.1016/j.bpsc.2020.11.011	https://pubmed.ncbi.nlm.nih.gov/33551284/
Wang et al 2022	iTBS vs sham	78.7	23.791 ± 5.325	24.152 ± 4.619	33	26	iTBS	80	14	1800	25200	left DPLFC	Yes	fMRI guided	(-38 44 26)	sham coil	MagStim Rapid2 stimulator with a 70-mm air-cooled figure-eight coil	Tangential to the midline	MoCA (general cognitive assessment)	26.304 (1.787)	27.347 (1.469)	1.04 (1.65)	25.346 (2.952)	26.230 (2.903)	0.88 (2.93)	10.1016/j.jpsychires.2022.02.019	https://www.cochranelibrary.com/central/doi/10.1002/central/CN-02375941/full
Wen et al 2021	rTMS vs sham	55.7	41.4 ± 7.5	38.8 ± 9.1	26	26	10Hz	110	20	1600	32000	left DLPFC	No	Scalp based / 5.5 cm anterior	NA	sham position	YRDCCY-I stimulator (Yiruide Medical Equipment New Technology Co., Ltd., Wuhan, China) connected to a Figure-eight-shaped coil	Tangential to the midline	RBANS total score	59.3 (11.2)	70.5 (13.5)	11.20 (12.51)	59.3 (11.2)	63.3 (11.3)	4.00 (11.25)	10.3389/fpsyt.2021.736094	https://www.frontiersin.org/articles/10.3389/fpsyt.2021.736094/full
Xiu et al 2020a	rTMS vs sham	NA	51.4 ± 9.1	54.7 ± 6.4	40	40	10Hz	110	40	1200	48000	left DLPFC	Yes	fMRI guided / superior BA 46 and posterior region BA 9.	NA	sham coil	MagStim Rapid2 stimulator with a 8-shaped coil	Tangential to the midline	RBANS total score	61.2 (12.1)	74.0 (14.6)	12.80 (13.528)	58.6 (12.2)	71.3 (14.8)	12.70 (13.69)	10.1093/schbul/sbaa035.	https://pubmed.ncbi.nlm.nih.gov/32185388/
Xiu et al 2020b	rTMS vs sham	NA	52.0 ± 10.1	54.7 ± 6.4	40	40	20Hz	90	20	1600	64000	left DLPFC	Yes	fMRI guided / superior BA 46 and posterior region BA 9.	NA	sham coil	MagStim Rapid2 stimulator with a 8-shaped coil	Tangential to the midline	RBANS total score	60.9 (12.1)	78.1 (16.2)	17.2 (14.62)	58.6 (12.2)	71.3 (14.8)	12.70 (13.69)	10.1093/schbul/sbaa035.	https://pubmed.ncbi.nlm.nih.gov/32185388/
Zhuo et al 2019a	rTMS vs sham	68.3	28.97 ± 7.40	30.63 ± 8.25	33	27	20Hz	90	20	2000	40000	left DPLFC	No	EEG landmarks / F3	F3	sham position	MagPro X100 stimulator (MagVenture) and a standard butterfly coil (MFC-B65)	Tangential to the midline	SANS	48.09 (11.2)	33.91 (7.7)	14.18 (9.92)	50.33 (12.55)	41 (12.7)	9.33 (12.63)	10.2147/NDT.S196086	https://www.cochranelibrary.com/central/doi/10.1002/central/CN-01963607/full
Wölwer et al 2014	rTMS vs sham	78	34.3	34.4	18	14	10Hz	110	10	1000	10000	left DPLFC	No	Scalp-based /5cm rule	-38, 25, 49	sham coil	MagPro X100 stimulator (MagVenture) and a standard butterfly coil (MFC-B65)	Tangential to the midline	Facial Affect Recognition Task	65.3 (10.5)	74.2 (5.7)	8.9 (11.95)	65.6 (3.0)	67.2 (3.9)	1.6 (4.92)	10.1016/j.brs.2014.04.011	https://pubmed.ncbi.nlm.nih.gov/24857264/
