# Supplementary material for: Mapping Symptom-General and Symptom-Specific Targets for Transcranial Magnetic Stimulation in Schizophrenia: An Electrical Modeling Meta-Analysis
Source: Research Square preprint supplement (doi:10.21203/rs.3.rs-5565115/v1), 2025-01-08
Supplement: Supplementary file 3 [file bd2fc3649d6164a1ab1ba60b.xlsx]

## Sheet: Pos.FInal
study	Type of study	Gender (%men)	Age		n_neuromod	n_sham	Frequency	Motor Threshold MT%	N of sessions	N of stimuli per session	Total stimuli	TMS target	Neuronavigation	Method of targetting (scalp-based, anatomical, EEG landmarks, MNI coordinates (x y z))	Inferred coordinates	Nature of sham	type of coil	orientation		Neuromod	Neuromod	Neuromod	Sham	Sham	Sham	comment	DOI	Reference
Study characteristics			TMS	Sham															Questionnaire type	Baseline	Endpoint	mn chnge(SD) or endpnt	Baseline	Endpoint	mnchnge(SD) or endpnt
Chibarro et al 2005	rTMS vs sham	68.5	39.1 (10.8)	41.0 (9.9)	8	8	1Hz	90	4	900	3600	left temporo-parietal cortex	No	EEG landmarks	T3-P3	sham position	Super Rapid Magnetic stimulator (The Magstim Company Limited, Withland, South West Wales, UK) with a figure 8-shaped coil	Tangetial to the midline	SAH	8.5 (1.2)	NA	-1.4 (10.292)	7.8 (0.8)	NA	-0.7 (10.292)	from graph	10.1016/j.neulet.2005.03.052.	https://www.cochranelibrary.com/central/doi/10.1002/central/CN-00660471/full
Fitzgerald et al 2005	rTMS vs sham	NA	NA	NA	17	16	1Hz	90	10	900	9000	Left auditory temporoparietal cortex	No	EEG landmarks	TP3	sham position	Magstim Super-Rapid, figure-of-8 coils	Tangetial to the midline	HCS	NA	NA	3.3 (4.1)	NA	NA	1,9 (4,2)		NA	https://pubmed.ncbi.nlm.nih.gov/16012279/
Goyal et al 2007	rTMS vs sham	100	29.8 (10.89)	26.2 (7.42)	5	5	10Hz	110	10	490	4900	Left DLPFC	No	Scalp based / 5cm rule	-38, 25, 49	sham position	Magstim Rapid®, figure-eight coil	Tangetial to the midline	PANSS	110	56	44 (10.292)	108	74	34 (10.292)	from graph	10.1176/jnp.2007.19.4.464	https://neuro.psychiatryonline.org/doi/full/10.1176/jnp.2007.19.4.464
Hoffman et al 2005	rTMS vs sham	66	35.1 (11.9)	35.5 (9.5)	27	23	1Hz	90	9	880	7920	Between left temporal and left parietal	No	EEG landmarks	T3-P3	sham position	MAGSTIM SUPER, figure-8 coil	Tangetial to the midline	HCS	NA	NA	4 (10.292)	NA	NA	1 (10.292)	from graph	10.1016/j.biopsych.2005.03.041	https://www.cochranelibrary.com/central/doi/10.1002/central/CN-00522326/full
Hoffman et al 2013	rTMS vs Sham	46	36.7 (11.0)	34 (10.0)	55	28	1Hz	90	5	960	4800	Wernicke’s area and right homologue	Yes	Neuronavigation using BrainLab system with Talairach coordinates (-65, -41, 9) and (+65, -38, 11)	wenicke : (-65, -41, 9) et "right" wernicke : (+65, -38, 11)	sham coil	MAGSTIM Rapid-2 system with air-cooled figure-8 coil	Tangetial to the midline	HCS	NA	6.38 (0.47)	6.38 (0.47)	NA	7.78 (0.67)	7.78 (.67)		10.1016/j.biopsych.2013.01.016	https://www.cochranelibrary.com/central/doi/10.1002/central/CN-00863008/full
Holi et al 2004	rTMS vs sham	86.3	38.5 (10.2)	34.8 (9.8)	11	11	10Hz	100	10	1000	10000	left DLPFC	No	Scalp based / 5cm rule	-38, 25, 49	sham position	Magstim Co., 70-mm figure eight-shaped coil	Tangetial to the midline	PANSS-P	23.6 (10.7)	20 (9.1)	-3.6 (4.7)	27 (5.6)	19.1 (7.4)	-7.9 (7.1)		10.1093/oxfordjournals.schbul.a007089	https://www.cochranelibrary.com/central/doi/10.1002/central/CN-00490440/full
Koops et al 2016	TB-rTMS vs sham	56.3	38 (15)	42 (13)	32	32	iTBS	80	10	3000	30000	left temporo-parietal cortex	No	EEG landmarks	T3-P3	sham coil	MagStim, 70-mm air-cooled figure-of-eight coil	Tangetial to the midline	AHRS	24 (5)	22 (6)	2 (3.6)	24 (5)	22 (6)	2 (3.6)		10.1093/schbul/sbv100	https://www.cochranelibrary.com/central/doi/10.1002/central/CN-01130775/full
Kumar 2020	rTMS vs sham	57	32.4 (9.20)	30.8 (9.34)	50	50	20Hz	100	20	2000	40000	left DLPFC	No	Scalp based / 5cm rule	-38, 25, 49	sham coil	Magstim Rapid2 with 70 mm figure-of-8 Double Rapid2 Air Cooled Coil	Tangetial to the midline	PANSS	65.7 (8.43)	48.4 (10.76)	17.3 (6.45)	67.00 (10.97)	55.2 (11.44)	11.8 (7.1)		10.1016/j.brs.2020.02.016	https://www.cochranelibrary.com/central/doi/10.1002/central/CN-02094249/full
Lee et al 2004	rTMS vs sham	60	40.3 (8.7)	40.3 (8.7)	13	14	1Hz	100	10	1200	12000	left temporo-parietal cortex	No	EEG landmarks	TP3	sham position	Neotonus figure 8 coil	NA	AHRS	6.8 (3.0)	4.6 (2.9)	2.2 (4.17)	4.9 (3.4)	4.3 (3.3)	0.6 (4.74)	AHRS "Frequency" item	10.1016/j.neulet.2004.11.048	https://www.sciencedirect.com/science/article/abs/pii/S0304394004014600?via%3Dihub
Macintosh et al 2004	rTMS vs sham	43.7	35.3 (8.7)	36.5 (13.4)	8	8	1 HZ	80	10	2505	25050	Left temporoparietal cortex	No	EEG landmarks	T3-P3	sham coil	Magstim Rapid-2 with figure 8 coil	Tangetial to the midline	PANSS P	18.6 (4.9)	16.4 (5.6)	2.2(3,38)	18.6 (4.9)	17.6 (6.4)	1(3.84)		10.1016/j.psychres.2004.03.005	https://pubmed.ncbi.nlm.nih.gov/15261700/
Martinot et al 2016	rTMS vs sham	NA	32.07 (6.79)	31.25 (7.78)	15	12	1HZ	100	10	1200	12000	Language Superior temporal cortex	Yes	fMRI guided	-52 -31 3	sham position	Magstim, air-cooled figure-of-8 coil	Tangetial to the midline	SAPS hallu subscore	19.40 (5.73)	11.8 (7.84)	7.6 (4.73)	17.25 (7.03)	9.25 (6.73)	8 (4.36)		10.1016/j.cpr.2016.11.009	https://pubmed.ncbi.nlm.nih.gov/27987221/
Ray et al 2015	rTMS vs sham	NA	31.35 (7.13)	29.30 (8.71)	20	20	1HZ	100	10	1200	12000	Left temporo-parietal region	No	EEG landmarks	PT3	not given	Magstim Rapid, figure-eight coil	Tangetial to the midline	AHRS	3.50 (0.89)	1.05 (1.10)	2.45 (0.66)	2.80 (0.90)	1.00 (1.10)	1.8 (0.66)	AHRS "Frequency" item	10.1016/j.schres.2015.01.038	https://pubmed.ncbi.nlm.nih.gov/25699086/
Rosenberg 2012	rTMS vs sham	83.3	39.2	38.4	5	5	1Hz	110	10	600	6000	left temporoparietal cortex	No	Scalp based / 4.5 cm posterior, 6.5 cm laterally towards left shoulder from MT	NA	sham coil	Brainsway H1 coil, connected to Magstim Rapid2 stimulator	Tangetial to the midline	AHRS	25.6 (6.5)	22.6 (6.2)	3 (4.02)	26.6 (6.5)	23 (5.8)	3.6 (3.94)		10.1016/j.bbr.2012.04.022	https://pubmed.ncbi.nlm.nih.gov/22559192/
Saba et al 2006	rTMS vx sham	72	30.7 (7.95)	30.6 (8.0)	8	8	1 hz	80	10	300	3000	left temporoparietal cortex	No	EEG landmarks	T3-P3	sham coil	Magstim rapid, figure-eight coil	Tangetial to the midline	PANSS - P	25.2 (4.6)	16.38 (6.26)	8.9 (3.77)	26.28 (2.91)	17.25 (4.59)	9.03(2.85)		10.1016/j.jpsychires.2005.02.008	https://www.cochranelibrary.com/central/doi/10.1002/central/CN-00560787/full
Slotema et al 2011	rTMS vs sham	58	38 (9.6)	41 (10.3)	22	20	1Hz	90	15	1200	18000	left temporoparietal cortex	No	EEG landmarks	T3-P3	sham position	Magstim Rapid2, figure-of-eight coil	Tangetial to the midline	AHRS	26 (6.6)	22.7 (6.4)	3.3 (4.11)	27.4 (6.9)	24.1 (8.1)	3.3 (4.87)		10.1016/j.schres.2010.11.033	https://pubmed.ncbi.nlm.nih.gov/21144499/
Tikka et al 2018	rTMS vs sham	100	28.40 (2.91)	25.50 (5.00)	8	7	iTBS	80	10	900	9000	Right Inferior Parietal Lobule (rIPL)	Yes	fMRI guided	-62.8, 78.1, -15.6	sham coil	Magstim Rapid2, air-cooled figure-of-eight coil	Tangetial to the midline	PANSS-P	25.25 (3.85)	22.25 (4.37)	3 (2.64)	24.29 (3.20)	22.14 (3.34)	2.15 (2.07)		10.1007/s00406-016-0712-3	https://pubmed.ncbi.nlm.nih.gov/27428476/
Tyagi et al 2022	rTMS vs sham	64.4	32.17 (11.222)	33.31 (11.480)	30	29	iTBS	80	20	600	12000	left AND right TPC	No	EEG landmarks	T3-P3 & T4-P4	sham coil	MagVenture - MagPro R30, B65 butterfly coils (figure 8)	Tangetial to the midline	AVHRS	51.10 (8.417)	46.07 (8.800)	5.3 (5.45)	47.31 (7.147)	44.00 (7.231)	3.31 (4.52)		10.1016/j.ajp.2022.103176	https://pubmed.ncbi.nlm.nih.gov/35661491/
Vercammen et al 2009	rTMS vs sham	50	33.75 (14.21)	36.50 (12.92)	12	12	1Hz	90	12	1200	14400	left temporo-parietal cortex	No	EEG landmarks	T3-P3	sham coil	Magstim Rapid System, 70 mm figure-of-eight coil	Tangetial to the midline	AHRS	NA	NA	NA	NA	NA	NA	effect size given = 0.65	10.1176/appi.neuropsych.21.3.260	https://pubmed.ncbi.nlm.nih.gov/19679450/
Zhu et al 2021	rTMS vs sham	64	35.16 (7.14)	35.34 (6.12)	32	32	iTBS	100	20	600	12000	Midline cerebellum	No	Anatomical	(1 cm below the inion) 0, -49, -18 approximately	sham position	MagPro X100, figure-of-eight cool coil; CCY-I stimulator	Tangetial to the midline	PANSS-P	12.44 (5.04)	NA	1.90 (4.983)	15.06 (5.33)	NA	1.94 (10.292)	from graph	10.1016/j.psychres.2021.114204	https://www.cochranelibrary.com/central/doi/10.1002/central/CN-02380965/full
